# Supplementary material for: Geospatial characteristics of measles transmission in China during 2005−2014
Source: PubMed Central journal article supplement (PMC5395235; doi:10.1371/journal.pcbi.1005474), 2017-04-04

(A) Recursive Merging

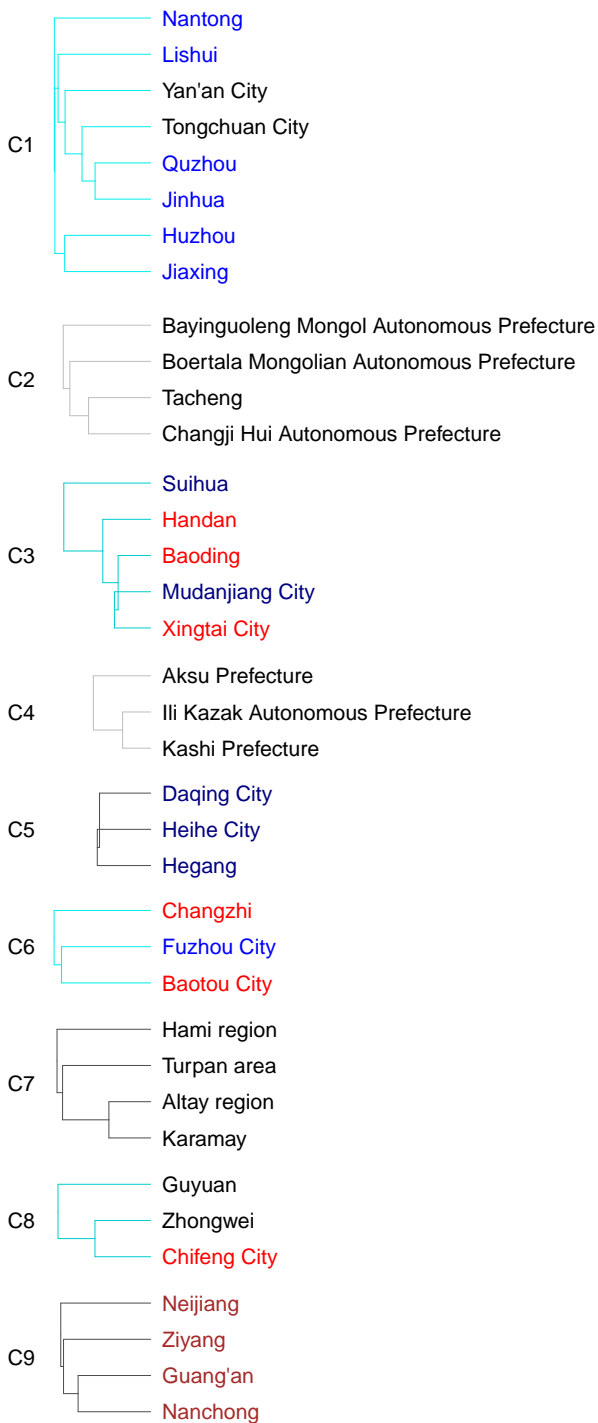

(B) hclust

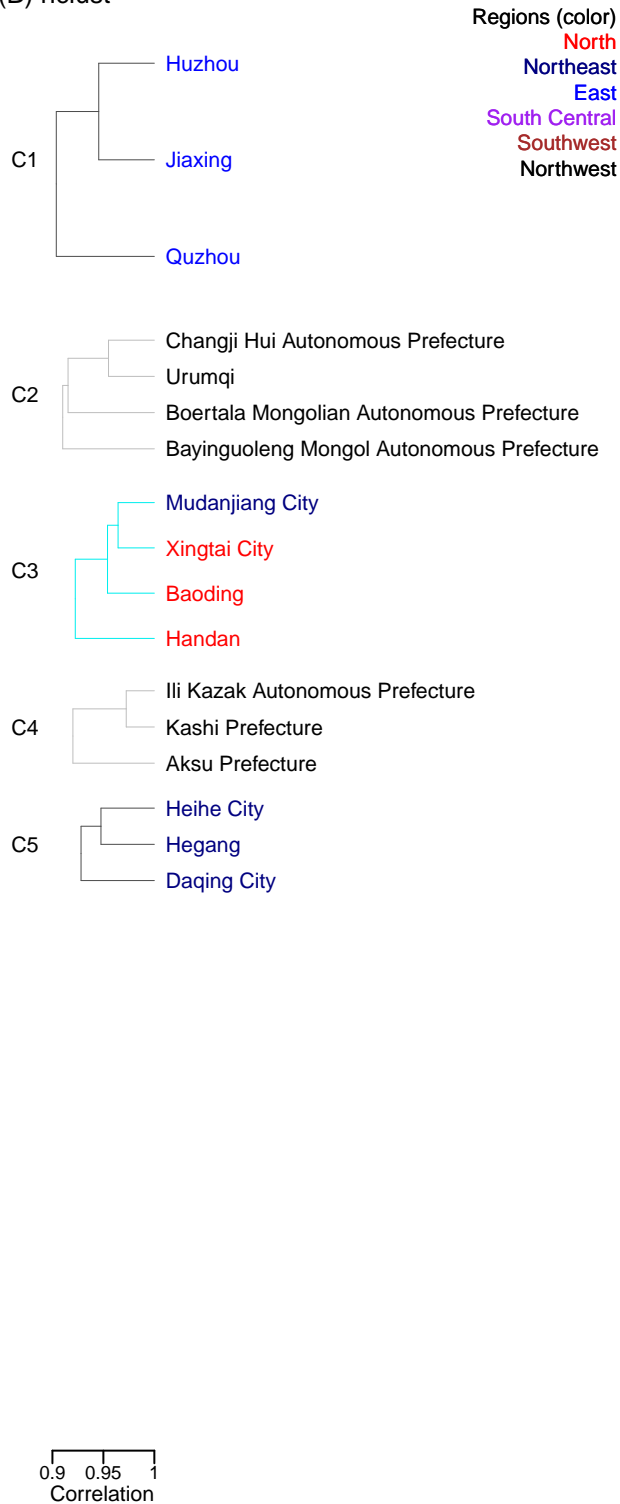

Supplement: pcbi.1005474.s009.pdf [file pcbi.1005474.s009.pdf]
